# Supplementary material
Source: PubMed Central journal article supplement (PMC4624008)
Supplement: NIHMS698978-supplement-726_2015_2019_MOESM7_ESM.pdf [file NIHMS698978-supplement-726_2015_2019_MOESM7_ESM.pdf]

Supplementary Table 1 - Intra day variability

| compound        | Cpd ID | parent   | medRt | SD1_500fmol_01 | SD1_500fmol_02 | SD1_500fmol_03 | SD1_500fmol_04 | SD1_500fmol_05 | STD DEV  | MEAN     | CV    |
|-----------------|--------|----------|-------|----------------|----------------|----------------|----------------|----------------|----------|----------|-------|
| L-Alanine       | C00041 | 90.05556 | 1.56  | 7.43E+07       | 7.11E+07       | 7.05E+07       | 6.16E+07       | 6.94E+07       | 4.72E+06 | 6.94E+07 | 6.81% |
| L-Arginine      | C00062 | 175.1188 | 1.55  | 3.17E+07       | 3.58E+07       | 3.35E+07       | 3.30E+07       | 3.46E+07       | 1.59E+06 | 3.37E+07 | 4.70% |
| L-Aspartate     | C00049 | 134.0448 | 1.58  | 2.44E+07       | 2.27E+07       | 2.43E+07       | 2.43E+07       | 2.30E+07       | 8.33E+05 | 2.38E+07 | 3.51% |
| L-Glutamate     | C00025 | 148.0603 | 1.57  | 6.01E+07       | 5.71E+07       | 5.98E+07       | 5.89E+07       | 5.85E+07       | 1.20E+06 | 5.89E+07 | 2.04% |
| L-Histidine     | C00135 | 156.0767 | 1.51  | 8416361        | 8041556        | 8299436        | 8095296        | 8183054        | 1.52E+05 | 8.21E+06 | 1.86% |
| L-Isoleucine    | C00407 | 132.1019 | 2.34  | 2.61E+08       | 2.56E+08       | 2.55E+08       | 2.49E+08       | 2.46E+08       | 6.07E+06 | 2.54E+08 | 2.39% |
| L-Leucine       | C00123 | 132.1019 | 2.45  | 3.02E+08       | 2.95E+08       | 3.14E+08       | 2.96E+08       | 2.78E+08       | 1.30E+07 | 2.97E+08 | 4.38% |
| L-Lysine        | C00047 | 147.1127 | 1.30  | 9585913        | 9143761        | 8874257        | 9028893        | 9188429        | 2.65E+05 | 9.16E+06 | 2.89% |
| L-Methionine    | C00073 | 150.0583 | 2.11  | 1.19E+08       | 1.08E+08       | 1.14E+08       | 1.17E+08       | 1.09E+08       | 4.91E+06 | 1.13E+08 | 4.33% |
| L-Phenylalanine | C00079 | 166.0861 | 3.86  | 5.67E+08       | 5.70E+08       | 5.37E+08       | 5.64E+08       | 5.89E+08       | 1.84E+07 | 5.65E+08 | 3.26% |
| L-Proline       | C00148 | 116.0708 | 1.61  | 2.33E+08       | 2.46E+08       | 2.45E+08       | 2.31E+08       | 2.43E+08       | 7.06E+06 | 2.39E+08 | 2.95% |
| L-Serine        | C00065 | 106.0503 | 1.56  | 5884118        | 5388939        | 5542038        | 5658588        | 5233367        | 2.50E+05 | 5.54E+06 | 4.51% |
| L-Threonine     | C00188 | 120.0657 | 1.56  | 2.79E+07       | 2.53E+07       | 2.65E+07       | 2.70E+07       | 2.49E+07       | 1.22E+06 | 2.63E+07 | 4.62% |
| L-Tyrosine      | C00082 | 182.081  | 2.43  | 2.29E+08       | 2.20E+08       | 2.15E+08       | 2.01E+08       | 2.19E+08       | 1.03E+07 | 2.17E+08 | 4.74% |
| L-Valine        | C00183 | 118.0865 | 2.01  | 6.13E+07       | 5.77E+07       | 5.68E+07       | 6.09E+07       | 5.53E+07       | 2.61E+06 | 5.84E+07 | 4.46% |
| MEDIAN CV       |        |          |       |                |                |                |                |                |          |          | 4.33% |
