# Supplementary material
Source: PubMed Central journal article supplement (PMC4624008)
Supplement: NIHMS698978-supplement-726_2015_2019_MOESM8_ESM.pdf [file NIHMS698978-supplement-726_2015_2019_MOESM8_ESM.pdf]

**Supplementary Table 2 - Inter day variability**

| SD1                      | compound | parent   | SD1 Day 1 | SD1 Day 2 | SD1 Day 3 | MEDIAN   | STDEV       | CV     |
|--------------------------|----------|----------|-----------|-----------|-----------|----------|-------------|--------|
| L-2-Aminoadipate         | C00956   | 162.076  | 7.63E+07  | 8.04E+07  | 8.67E+07  | 8.04E+07 | 5249282.349 | 6.53%  |
| Alanine                  | C01401   | 90.0556  | 1.98E+07  | 2.48E+07  | 3.31E+07  | 2.48E+07 | 6711105.334 | 27.07% |
| L-Arginine               | C00062   | 175.1189 | 3.78E+07  | 3.95E+07  | 3.99E+07  | 3.95E+07 | 1122125.817 | 2.84%  |
| L-Aspartate              | C00049   | 134.0448 | 2581076   | 2919057   | 3985464   | 2.92E+06 | 733003.0355 | 25.11% |
| L-3-Amino-isobutanoate   | C03284   | 104.0711 | 5.50E+07  | 6.06E+07  | 6.88E+07  | 6.06E+07 | 6965526.844 | 11.50% |
| L-Cysteine               | C00097   | 122.0273 | 102480.2  | 65430.21  | 117390.7  | 1.02E+05 | 26754.80421 | 26.11% |
| L-Cystine                | C00491   | 241.0309 | 1123994   | 1651520   | 2000486   | 1.65E+06 | 441266.9592 | 26.72% |
| L-Citrulline             | C00327   | 176.103  | 6702750   | 4892360   | 9851456   | 6.70E+06 | 2509465.234 | 37.44% |
| L-Glutamate              | C00025   | 148.0604 | 7035512   | 7642614   | 9880888   | 7.64E+06 | 1498588.665 | 19.61% |
| Glycine                  | C00037   | 76.04011 | 1.49E+07  | 1.63E+07  | 1.51E+07  | 1.51E+07 | 766244.0092 | 5.09%  |
| L-Histidine              | C00135   | 156.0768 | 1.31E+07  | 1.47E+07  | 1.63E+07  | 1.47E+07 | 1572440.481 | 10.70% |
| trans-L-3-Hydroxyproline | C05147   | 132.0656 | 1.11E+07  | 1.59E+07  | 2.16E+07  | 1.59E+07 | 5245590.639 | 32.98% |
| L-Isoleucine             | C00407   | 132.1019 | 1.48E+09  | 1.56E+09  | 1.58E+09  | 1.56E+09 | 55761484.45 | 3.57%  |
| L-Leucine                | C00123   | 132.1019 | 1.79E+09  | 1.56E+09  | 2.04E+09  | 1.79E+09 | 240081784.1 | 13.38% |
| L-Lysine                 | C00047   | 147.1128 | 2.41E+07  | 2.30E+07  | 2.65E+07  | 2.41E+07 | 1822698.082 | 7.55%  |
| L-Methionine             | C00073   | 150.0582 | 6.13E+08  | 6.66E+08  | 6.89E+08  | 6.66E+08 | 38851467.54 | 5.83%  |
| N(pi)-Methyl-L-histidine | C01152   | 170.0923 | 3.33E+07  | 3.40E+07  | 4.37E+07  | 3.40E+07 | 5823935.992 | 17.13% |
| L-Ornithine              | C00077   | 133.0972 | 1.09E+07  | 1.18E+07  | 1.40E+07  | 1.18E+07 | 1577120.7   | 13.34% |
| L-Phenylalanine          | C00079   | 166.0861 | 1.75E+09  | 1.87E+09  | 1.86E+09  | 1.86E+09 | 63816426.52 | 3.43%  |
| L-Proline                | C00148   | 116.0709 | 1.14E+08  | 1.16E+08  | 1.58E+08  | 1.16E+08 | 24872708.74 | 21.37% |
| Sarcosine                | C00213   | 90.05558 | 1.98E+07  | 2.48E+07  | 3.31E+07  | 2.48E+07 | 6711105.334 | 27.07% |
| L-Serine                 | C00065   | 106.0503 | 1577800   | 1968771   | 2380614   | 1.97E+06 | 401452.2176 | 20.39% |
| L-Threonine              | C00188   | 120.0658 | 3870674   | 4893380   | 7370326   | 4.89E+06 | 1799479.238 | 36.77% |
| L-Tyrosine               | C00082   | 182.081  | 1.12E+09  | 1.28E+09  | 1.47E+09  | 1.28E+09 | 175932662.8 | 13.72% |
| L-Valine                 | C00183   | 118.0865 | 1.88E+08  | 1.94E+08  | 2.15E+08  | 1.94E+08 | 14162591.02 | 7.28%  |
|                          |          |          |           |           |           |          | MEDIAN CV   | 13.72% |
|                          |          |          |           |           |           |          | STDEV CV    | 10.76% |
