# Supplementary material
Source: PubMed Central journal article supplement (PMC4624008)
Supplement: NIHMS698978-supplement-726_2015_2019_MOESM9_ESM.pdf [file NIHMS698978-supplement-726_2015_2019_MOESM9_ESM.pdf]

**Supplementary Table 4 - RT drift in biological matrix with lysis buffer (MetOH:ACN:H2O)**

|                          | Standard RT | Matrix RT | DEVIATION (min) |
|--------------------------|-------------|-----------|-----------------|
| L-Alanine                | 1.3         | 1.19      | -0.09           |
| L-Arginine               | 1.1         | 1.18      | 0.08            |
| L-Aspartate              | 1.3         | 1.19      | -0.08           |
| L-Cysteine               | 1.26        | 1.20      | -0.05           |
| L-Cystine                | 1.16        | 1.20      | 0.03            |
| L-Citrulline             | 1.27        | 0.81      | -0.36           |
| L-Glutamate              | 1.2         | 1.19      | -0.01           |
| Glycine                  | 1.14        | 1.19      | 0.04            |
| L-Histidine              | 1.22        | 1.08      | -0.11           |
| trans-L-3-Hydroxyproline | 1.22        | 1.20      | -0.02           |
| L-Isoleucine             | 1.78        | 1.55      | -0.13           |
| L-Leucine                | 1.72        | 1.24      | -0.28           |
| L-Lysine                 | 1.05        | 1.07      | 0.02            |
| L-Methionine             | 1.64        | 1.23      | -0.25           |
| L-Ornithine              | 1.03        | 0.80      | -0.23           |
| L-Phenylalanine          | 2.92        | 1.96      | -0.33           |
| L-Proline                | 1.25        | 1.21      | -0.03           |
| L-Serine                 | 1.24        | 1.19      | -0.04           |
| L-Threonine              | 1.29        | 1.19      | -0.08           |
| L-Tyrosine               | 1.79        | 1.94      | 0.08            |
| L-Valine                 | 1.41        | 1.22      | -0.13           |
| L-Asparagine             | 1.21        | 1.19      | -0.02           |
| L-Glutamine              | 1.19        | 1.19      | 0.00            |
| L-Tryptophan             | 2.79        | 1.35      | -0.52           |
| <b>MEDIAN</b>            |             |           | <b>-0.06</b>    |
