# Supplementary material
Source: PubMed Central journal article supplement (PMC4624008)
Supplement: NIHMS698978-supplement-726_2015_2019_MOESM10_ESM.pdf [file NIHMS698978-supplement-726_2015_2019_MOESM10_ESM.pdf]

**Supplementary Table 3 - Matrix effects in Red Blood Cell extracts**

| N. | compound                 | SD1/RBC1 | SD1/RBC2 | SD1/RBC3 |
|----|--------------------------|----------|----------|----------|
| 1  | L-Arginine               | 7.37     | 9.97     | 8.85     |
| 3  | L-Cysteine               | 4.26     | 2.39     | 11.27    |
| 4  | L-Citrulline             | 5.25     | 4.81     | 5.13     |
| 5  | L-Glutamate              | 2.72     | 3.33     | 3.71     |
| 6  | L-Histidine              | 2.06     | 2.28     | 2.18     |
| 7  | trans-L-3-Hydroxyproline | 6.03     | 10.88    | 8.36     |
| 8  | Isoleucine               | 1.15     | 1.75     | 1.70     |
| 9  | L-Lysine                 | 1.18     | 1.15     | 1.23     |
| 10 | L-Methionine             | 2.77     | 3.54     | 3.37     |
| 11 | Ornithine                | 1.54     | 1.31     | 1.27     |
| 12 | L-Proline                | 0.50     | 0.41     | 0.32     |
| 13 | L-Serine                 | 3.19     | 3.99     | 4.05     |
| 14 | L-Threonine              | 2.30     | 2.80     | 2.20     |
| 15 | L-Tyrosine               | 1.53     | 2.06     | 2.43     |
|    | MEDIAN                   | 2.51     | 2.59     | 2.90     |
|    | STDEV                    | 1.96     | 3.02     | 3.18     |
|    | TOT MEDIAN Fold change   | 2.59     |          |          |
|    | TOT STDEV                | 0.66     |          |          |

| RBC replicate #1         |          |          |          |          |                          | R (Pearson correlation) |
|--------------------------|----------|----------|----------|----------|--------------------------|-------------------------|
| pmol injected            | 0.00     | 0.50     | 2.50     | 5.00     |                          |                         |
| L-Arginine               | 1.65E+05 | 4.05E+05 | 3.94E+06 | 3.30E+06 | L-Arginine               | 0.82                    |
| L-Cysteine               | 5.28E+03 | 5.59E+04 | 2.63E+05 | 2.45E+05 | L-Cysteine               | 0.87                    |
| L-Citrulline             | 9.11E+05 | 9.02E+05 | 3.01E+06 | 3.66E+06 | L-Citrulline             | 0.96                    |
| L-Glutamate              | 2.46E+06 | 2.86E+06 | 4.29E+06 | 4.27E+06 | L-Glutamate              | 0.89                    |
| L-Histidine              | 2.43E+06 | 2.74E+06 | 3.96E+06 | 4.61E+06 | L-Histidine              | 0.98                    |
| trans-L-3-Hydroxyproline | 1.05E+05 | 4.17E+05 | 3.65E+06 | 5.47E+06 | trans-L-3-Hydroxyproline | 0.98                    |
| Isoleucine               | 5.91E+07 | 7.32E+07 | 9.23E+07 | 1.01E+08 | Isoleucine               | 0.94                    |
| L-Lysine                 | 3.80E+06 | 4.31E+06 | 5.81E+06 | 6.19E+06 | L-Lysine                 | 0.94                    |
| L-Methionine             | 4.95E+06 | 8.04E+06 | 1.87E+07 | 2.57E+07 | L-Methionine             | 0.99                    |
| Ornithine                | 2.21E+06 | 2.45E+06 | 2.79E+06 | 3.65E+06 | Ornithine                | 0.99                    |
| L-Proline                | 7.32E+07 | 7.70E+07 | 9.85E+07 | 1.01E+08 | L-Proline                | 0.92                    |
| L-Serine                 | 1.09E+06 | 9.53E+05 | 1.41E+06 | 1.44E+06 | L-Serine                 | 0.87                    |
| L-Threonine              | 3.13E+06 | 3.30E+06 | 3.94E+06 | 4.50E+06 | L-Threonine              | 1.00                    |
| L-Tyrosine               | 1.60E+07 | 1.81E+07 | 2.45E+07 | 2.69E+07 | L-Tyrosine               | 0.96                    |
|                          |          |          |          |          | Mean                     | 0.95                    |

| RBC replicate #2         |          |          |          |          |                          |      |
|--------------------------|----------|----------|----------|----------|--------------------------|------|
| pmol injected            | 0.00     | 0.50     | 2.50     | 5.00     |                          |      |
| L-Arginine               | 2.76E+05 | 5.63E+05 | 1.69E+06 | 2.90E+06 | L-Arginine               | 1.00 |
| L-Cysteine               | 1.68E+05 | 2.04E+05 | 3.72E+05 | 4.38E+05 | L-Cysteine               | 0.97 |
| L-Citrulline             | 1.53E+06 | 1.82E+06 | 3.19E+06 | 4.00E+06 | L-Citrulline             | 0.98 |
| L-Glutamate              | 2.17E+06 | 2.44E+06 | 3.50E+06 | 4.40E+06 | L-Glutamate              | 1.00 |
| L-Histidine              | 2.59E+06 | 2.71E+06 | 3.37E+06 | 3.68E+06 | L-Histidine              | 0.98 |
| trans-L-3-Hydroxyproline | 1.31E+05 | 7.89E+04 | 2.02E+06 | 4.57E+06 | trans-L-3-Hydroxyproline | 0.99 |
| Isoleucine               | 5.39E+07 | 5.23E+07 | 6.05E+07 | 8.49E+07 | Isoleucine               | 0.96 |
| L-Lysine                 | 4.73E+06 | 5.15E+06 | 5.91E+06 | 7.05E+06 | L-Lysine                 | 1.00 |
| L-Methionine             | 3.55E+06 | 5.19E+06 | 1.41E+07 | 2.12E+07 | L-Methionine             | 0.99 |
| Ornithine                | 2.48E+06 | 2.66E+06 | 3.28E+06 | 3.64E+06 | Ornithine                | 0.98 |
| L-Proline                | 9.55E+07 | 1.08E+08 | 1.19E+08 | 1.30E+08 | L-Proline                | 0.95 |
| L-Serine                 | 8.23E+05 | 8.28E+05 | 9.31E+05 | 1.15E+06 | L-Serine                 | 0.98 |
| L-Threonine              | 2.02E+06 | 2.35E+06 | 3.24E+06 | 3.68E+06 | L-Threonine              | 0.97 |
| L-Tyrosine               | 1.10E+07 | 1.26E+07 | 1.83E+07 | 2.10E+07 | L-Tyrosine               | 0.97 |
|                          |          |          |          |          | Mean                     | 0.98 |

| RBC replicate #3 |          |          |          |          |            |      |
|------------------|----------|----------|----------|----------|------------|------|
| pmol injected    | 0.00     | 0.50     | 2.50     | 5.00     |            |      |
| L-Arginine       | 3.99E+04 | 3.47E+05 | 3.29E+06 | 2.75E+06 | L-Arginine | 0.83 |
| L-Cysteine       | 3.74E+03 | 4.07E+03 | 7.38E+04 | 1.58E+05 | L-Cysteine | 1.00 |
|                  |          |          |          |          | SD         | 0.01 |
|                  |          |          |          |          | CV         | 0.02 |

|                          |          |          |          |          |                          |      |
|--------------------------|----------|----------|----------|----------|--------------------------|------|
| L-Citrulline             | 1.60E+06 | 1.73E+06 | 2.94E+06 | 4.27E+06 | L-Citrulline             | 1.00 |
| L-Glutamate              | 1.71E+06 | 2.21E+06 | 3.07E+06 | 4.02E+06 | L-Glutamate              | 0.99 |
| L-Histidine              | 2.32E+06 | 2.84E+06 | 3.63E+06 | 3.94E+06 | L-Histidine              | 0.94 |
| trans-L-3-Hydroxyproline | 4.83E+05 | 4.39E+05 | 2.63E+06 | 6.12E+06 | trans-L-3-Hydroxyproline | 0.99 |
| Isoleucine               | 4.27E+07 | 4.63E+07 | 6.25E+07 | 8.01E+07 | Isoleucine               | 1.00 |
| L-Lysine                 | 4.37E+06 | 4.37E+06 | 5.51E+06 | 6.19E+06 | L-Lysine                 | 0.98 |
| L-Methionine             | 2.24E+06 | 4.30E+06 | 1.32E+07 | 2.22E+07 | L-Methionine             | 1.00 |
| Ornithine                | 2.60E+06 | 2.70E+06 | 3.36E+06 | 3.88E+06 | Ornithine                | 0.99 |
| L-Proline                | 1.45E+08 | 1.61E+08 | 1.52E+08 | 1.73E+08 | L-Proline                | 0.75 |
| L-Serine                 | 7.93E+05 | 7.44E+05 | 1.03E+06 | 1.16E+06 | L-Serine                 | 0.97 |
| L-Threonine              | 3.42E+06 | 3.51E+06 | 4.12E+06 | 4.43E+06 | L-Threonine              | 0.98 |
| L-Tyrosine               | 8.65E+06 | 1.02E+07 | 1.55E+07 | 2.19E+07 | L-Tyrosine               | 1.00 |
|                          |          |          |          |          | Mean                     | 0.99 |
|                          |          |          |          |          | SD                       | 0.07 |
|                          |          |          |          |          | CV                       | 0.08 |

|       | RBC 0 | RBC 1 | RBC 2 | AVG  |
|-------|-------|-------|-------|------|
| R     | 0.95  | 0.98  | 0.99  | 0.97 |
| STDEV | 0.05  | 0.01  | 0.07  | 0.05 |
| CV    | 0.06  | 0.02  | 0.08  | 0.05 |
