# Supplementary material
Source: PubMed Central journal article supplement (PMC4624008)
Supplement: NIHMS698978-supplement-726_2015_2019_MOESM11_ESM.pdf [file NIHMS698978-supplement-726_2015_2019_MOESM11_ESM.pdf]

Supplementary Table 5 - Absolute quantitation through heavy labeled spiked in internal standards in three different matrices

|                                                 | BALF               | Plasma                 | Lymph                  |
|-------------------------------------------------|--------------------|------------------------|------------------------|
| <b>CVs on raw values (%)</b>                    |                    |                        |                        |
| 13C-Arginine                                    | 10.57%             | 17.52%                 | 5.85%                  |
| 13C-Lysine                                      | 6.00%              | 7.85%                  | 6.02%                  |
| 13C15N-Glutamine                                | 11.95%             | 21.55%                 | 18.32%                 |
| <b>Measurable fold change (2:1 theoretical)</b> |                    |                        |                        |
| 13C-Arginine                                    | 1.32±0.11 (8.2%)   | 2.00±0.10 (4.9%)       | 2.07±0.06 (2.8%)       |
| 13C-Lysine                                      | 2.14±0.13 (6.2%)   | 2.05±0.18 (8.9%)       | 2.07±0.04 (1.9%)       |
| 13C15N-Glutamine                                | 2.00±0.21 (10.5%)  | 2.15±0.4 (17%)         | 2.84±0.52 (18%)        |
| <b>Absolute quantitation (uM - (CV))</b>        |                    |                        |                        |
| <b>Arginine</b>                                 |                    |                        |                        |
| Control                                         | 1.79±0.39 (21.9%)  | 157.51±11.73 (7.4%)    |                        |
| T/SS pre-shock                                  |                    | 122.79±14.64 (11.9%)   |                        |
| T/SS post-shock                                 | 1.51±0.09 (6.5%)   | 114.37±10.00 (8.7%)    |                        |
| T/SS + MLD pre-shock                            |                    | 159.21±9.47 (5.9%)     | 182.69±38.09 (20.8%)   |
| T/SS + MLD post-shock                           | 4.23±0.5 (11.8%)   | 99.82±8.80 (8.8%)      | 206.69±27.84 (13.5%)   |
| T/HS pre-shock                                  |                    | 157.70±4.93 (3.1%)     |                        |
| T/HS post-shock                                 | 3.04 ±0.17 (5.7%)  | 195.44±3.58 (1.8%)     |                        |
| T/HS + MLD pre-shock                            |                    | 131.04±13.6 (10.4%)    | 172.67±21.29 (12.3%)   |
| T/HS + MLD post-shock                           | 7.30±0.23 (3.2%)   | 182.70±20.64 (11.3%)   | 181.67 ± 21.29 (12.3%) |
| <b>MEDIAN CVs (± SD)</b>                        | <b>12.5±8.4%</b>   | <b>8.9±3.5%</b>        | <b>12.3±7.1%</b>       |
| <b>Lysine</b>                                   |                    |                        |                        |
| Control                                         | 4.85±0.79 (16.3%)  | 322.56±27.17 (8.4%)    |                        |
| T/SS pre-shock                                  |                    | 271.54 ±32.83 (12.1%)  |                        |
| T/SS post-shock                                 | 4.50±0.20 (4.4%)   | 260.21±25.11 (9.6%)    |                        |
| T/SS + MLD pre-shock                            |                    | 370.70±29.31 (7.9%)    | 182.69±38.09 (20.8%)   |
| T/SS + MLD post-shock                           | 12.69±1.00 (7.9%)  | 308.13±24.14 (7.8%)    | 206.69±27.84 (13.5%)   |
| T/HS pre-shock                                  |                    | 357.70±24.45 (6.8%)    |                        |
| T/HS post-shock                                 | 9.61±0.43 (4.5%)   | 547.64±12.56 (2.3%)    |                        |
| T/HS + MLD pre-shock                            |                    | 278.86±26.18 (9.4%)    | 172.67±21.29 (12.3%)   |
| T/HS + MLD post-shock                           | 31.04 ±1.42 (4.6%) | 648.23±84.88 (13.1%)   | 181.67±12.37 (6.8%)    |
| <b>MEDIAN CVs (± SD)</b>                        | <b>10.5±5.9%</b>   | <b>8.9±3.3%</b>        | <b>12.3±7.1%</b>       |
| <b>Glutamine</b>                                |                    |                        |                        |
| Control                                         | 7.31±0.73 (10.0%)  | 610±57.97 (9.5%)       |                        |
| T/SS pre-shock                                  |                    | 532.48±73.42 (13.8%)   |                        |
| T/SS post-shock                                 | 9.20±0.77 (8.4%)   | 582.04±46.53 (8.0%)    |                        |
| T/SS + MLD pre-shock                            |                    | 683.54±76.11 (11.1%)   | 767.73±57.89 (7.5%)    |
| T/SS + MLD post-shock                           | 38.25±2.88 (7.5%)  | 621.06±59.60 (9.6%)    | 828.87±119.74 (14.4%)  |
| T/HS pre-shock                                  |                    | 770.18±43.53 (5.65%)   |                        |
| T/HS post-shock                                 | 18.29±0.49 (2.7%)  | 1096.56±26.91 (2.45%)  |                        |
| T/HS + MLD pre-shock                            |                    | 616.76±46.04 (7.5%)    | 706.97±38.53 (5.4%)    |
| T/HS + MLD post-shock                           | 72.89±3.75 (5.1%)  | 1009.57±101.77 (10.1%) | 735.06±32.26 (4.4%)    |
| <b>MEDIAN CVs (± SD)</b>                        | <b>7.6±3.3%</b>    | <b>9.8±2.9%</b>        | <b>5.4±1.6%</b>        |
